# Supplementary material for: Metabolic Phenotypes—The Game Changer in Quality of Life of Obese Patients?
Source: MDPI journal article supplement (doi:10.3390/healthcare10040617), 2022-03-25
Supplement: s1 [file s1]

**Table S1.** Normality tests for quality of life scales and scores.

|     | Skewness | Kurtosis | Kolmogorov-Smirnov (p) | Shapiro–Wilk (p) |
|-----|----------|----------|------------------------|------------------|
| PF  | −0.258   | −0.998   | 0.001                  | 0.002            |
| RP  | 0.029    | −1.655   | 0.000                  | 0.000            |
| BP  | 0.097    | −0.663   | 0.000                  | 0.000            |
| GH  | −0.028   | −0.643   | 0.073                  | 0.163            |
| V   | −0.067   | −0.378   | 0.051                  | 0.207            |
| SF  | −0.240   | −1.057   | 0.000                  | 0.000            |
| RE  | −0.263   | −1.703   | 0.000                  | 0.000            |
| MH  | −0.745   | 0.650    | 0.045                  | 0.002            |
| PCS | 0.027    | −0.725   | 0.200                  | 0.198            |
